# Supplementary material for: Probing and quantifying cathode charge heterogeneity in Li ion batteries
Source: Royal Society of Chemistry journal article supplement (doi:10.1039/c9ta06977a), 2019-01-01
Supplement: c9ta06977a1.pdf [file c9ta06977a1.pdf]

## Supporting information-Probing and Quantifying Cathode Charge Heterogeneity in Li Ion Batteries

Yuxin Zhang,<sup>†</sup> Zhijie Yang,<sup>†</sup> Chixia Tian<sup>\*b</sup>

<sup>a</sup> Department of Chemistry, Virginia Tech, Blacksburg, VA 24061, USA

<sup>b</sup> Academy of Integrated Science, Virginia Tech, Blacksburg, VA 24061, USA

† Equal contribution, \*Email: ctian@vt.edu

Table S1. Summary of key charge heterogeneity characterization techniques covered in this review.

| Technique                                                                                 | Properties investigated                                                                | Sample environment                                   | Pros and Cons                                                                                                                                                                       |
|-------------------------------------------------------------------------------------------|----------------------------------------------------------------------------------------|------------------------------------------------------|-------------------------------------------------------------------------------------------------------------------------------------------------------------------------------------|
| Confocal diffraction X-ray                                                                | Bulk crystal structures, phase stability                                               | Electrode samples                                    | Can be used to map phases at different depths of an electrode. Good for thick electrodes. Spatial resolution is less appealing.                                                     |
| Transmission Microscopy (TXM) X-ray                                                       | 2-D, 3-D imaging, morphological, elemental distribution and chemical state information | Electrode particles, or small regions in electrodes. | Real-space full-field imaging technique. Spatial resolution is ~30 nm. Element-specific. Data collection is slow and challenging for in situ experiments.                           |
| Scanning transmission X-ray Microscopy (STXM),                                            | 2-D, 3-D imaging and mapping of element distributions and chemical states.             | Electrode particles                                  | Scanning imaging technique. Uses X-ray absorption spectroscopy to map elemental distributions and oxidations states. Data collection is slow and difficult for in situ experiments. |
| X-ray tomography                                                                          | 3-D imaging, elemental distribution, morphological information, oxidation states       | Electrode particles, electrodes, cells               | Full-field imaging technique. Need to have reconstruction technique to build 3D images. Can be coupled with XAS to give composition and oxidation state information in 3D.          |
| Scanning transmission electron microscope (STEM)-electron energy-loss spectroscopy (EELS) | 2-D, 3-D imaging, elemental mapping, oxidation states,                                 | Nanoparticles                                        | Scanning imaging mode, with good spatial resolution, elemental and oxidation state mapping, potentially 3D with reconstruction                                                      |
| Raman imaging                                                                             | 2-D imaging                                                                            | Electrode samples                                    | Spatial resolution is limited. easily accessible in most institutions.                                                                                                              |
